# Supplementary material
Source: Springer Nature journal article supplement (http://www.springermedizin.de/resource/supplementary/12979_2010_252_MOESM1_ESM.pdf/9603342)

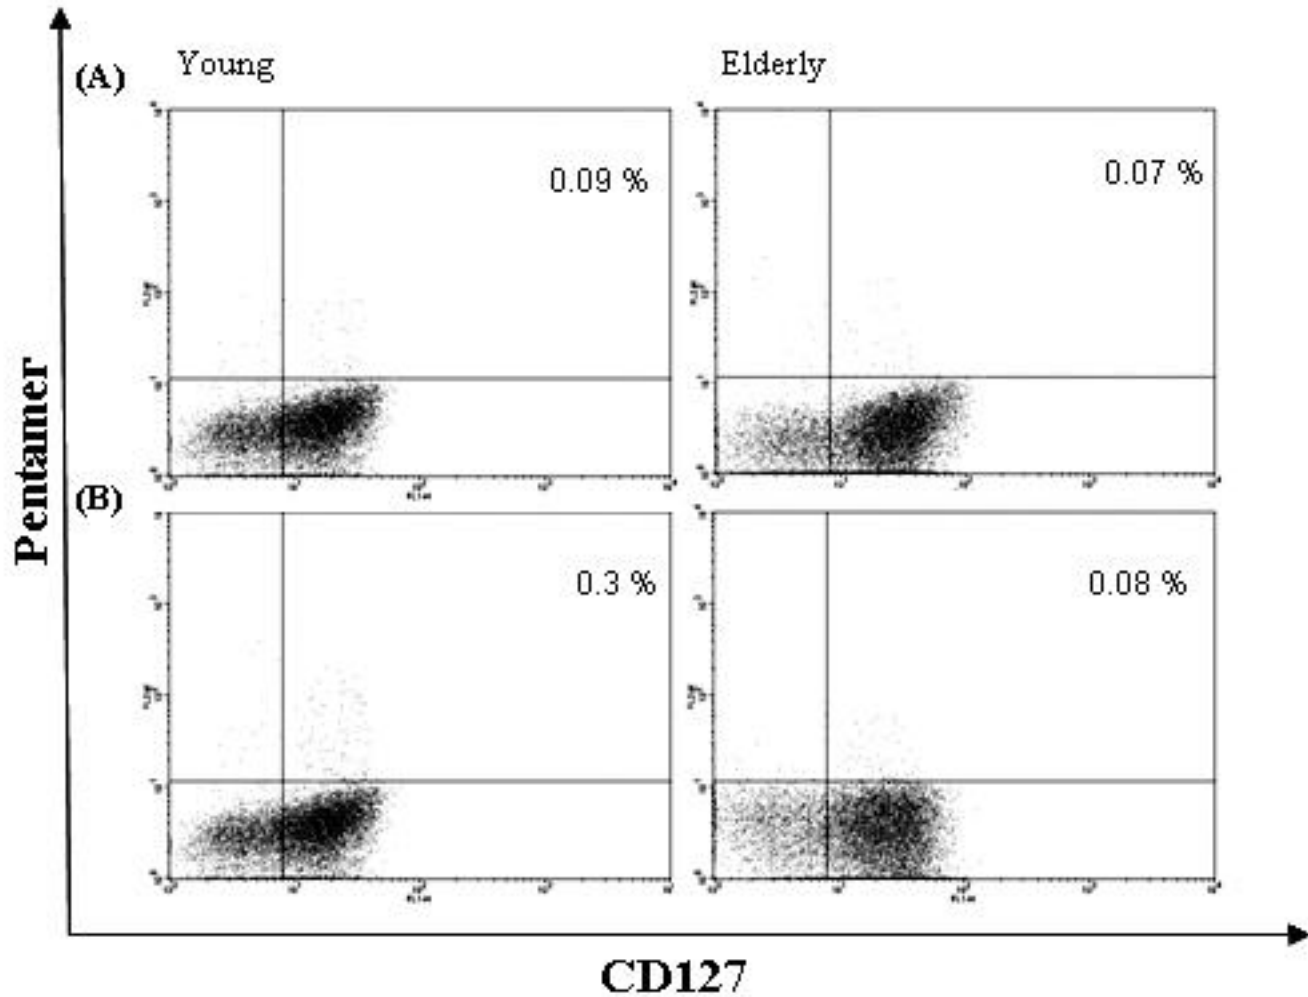

Supplement: MOESM1 [file 9603342]
